# Supplementary material for: Self-assembled structures in block copolymer/graft copolymer blends with hydrogen bonding interaction
Source: Royal Society of Chemistry journal article supplement (doi:10.1039/c2sm27545g), 2012-12-14
Supplement: c2sm27545g.pdf [file c2sm27545g.pdf]

## Supporting Information

### Self-assembled Structures in Block Copolymer/Graft Copolymer Blends with Hydrogen Bonding Interaction

*Yen-Tzu Chen and Chieh-Tsung Lo\**

Department of Chemical Engineering, National Cheng Kung University

No. 1, University Road, Tainan City 701, Taiwan

#### Fourier Transform Infrared Spectroscopy (FTIR) Measurements

Infrared spectra were recorded on a Scinco/Nicolet 5700 spectrometer at a resolution of 2 cm<sup>-1</sup>. A small amount of polymer blends was ground together with KBr powder. Subsequently, a ca. 0.5-1.0 mm thick tablet was prepared by compression. The tablet was gently taken out of the mold and was ready for analysis.

#### FTIR Spectroscopic Studies of the Hydrogen Bonding

*PS-*b*-PEO/PS-*g*-PAA blends*

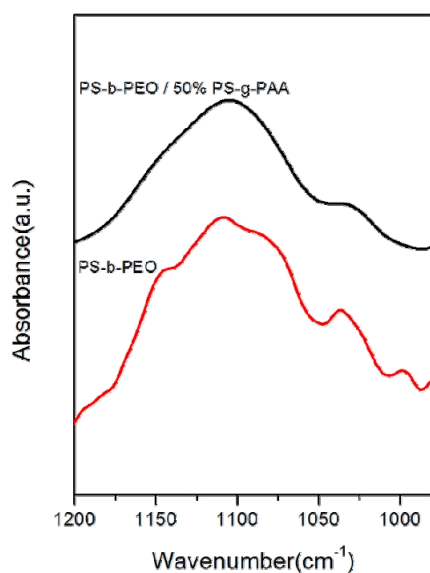

Figure S1. FTIR spectra of neat PS-*b*-PEO and its blend with 50 wt% PS-g-PAA.

#### *PS-b-PVP/PS-g-PAA blends*

Upon forming hydrogen bonds with the carboxylic acid groups of PAA, the characteristics peak of the pyridine ring at the wavenumber of 993 cm<sup>-1</sup> shifts to 1006 cm<sup>-1</sup>.

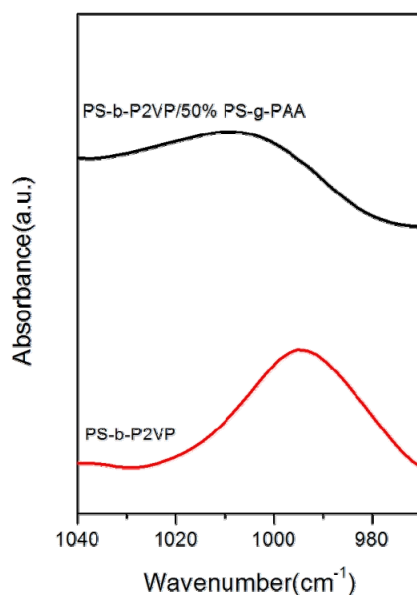

Figure S2. FTIR spectra of neat PS-*b*-PAA and its blend with 50 wt% PS-g-PAA.

*PS-b-PMMA/PS-g-PAA blends*

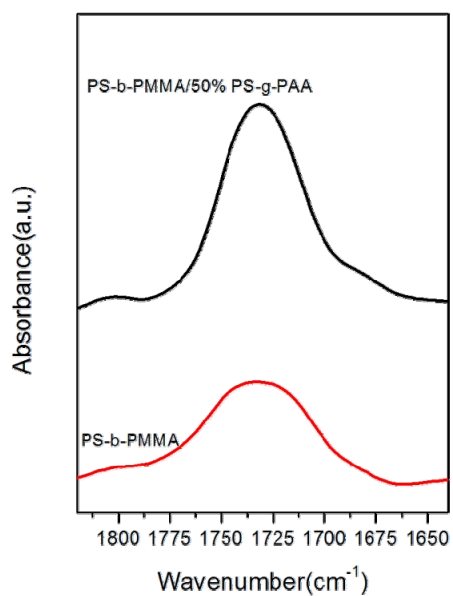

(a)

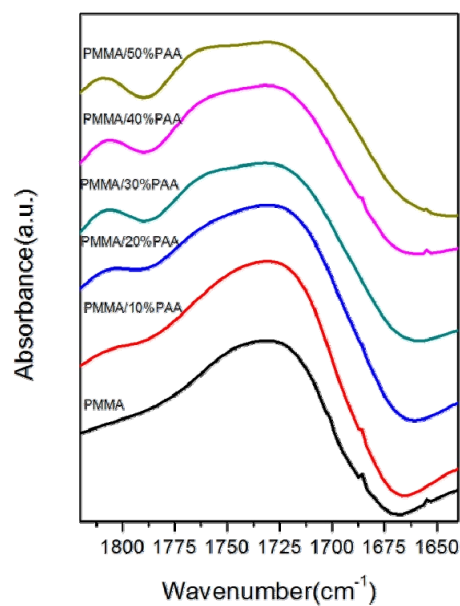

(b)

Figure S3. FTIR spectra of (a) neat PS-*b*-PAA and its blend with 50 wt% PS-*g*-PAA; and (b) neat PMMA and its blend with PAA.
